# Supplementary material for: Simulation of the Greenland Ice sheet over two glacial cycles: Investigating a sub-ice shelf melt parameterisation and relative sea level forcing in an ice sheet-ice shelf model
Source: Copernicus journal article supplement (doi:10.5194/cp-2017-132), 2017-10-16
Supplement: Supplementary file 2 [file cp-2017-132-supplement.zip]

Archive with 2 entries (2 files):
- Bradley_2017_SOM/Bradley_2017_SOM.pdf
- Bradley_2017_SOM/TablesS1_S7.xlsx
