# Supplementary material for: Simulation of the Greenland Ice sheet over two glacial cycles: Investigating a sub-ice shelf melt parameterisation and relative sea level forcing in an ice sheet-ice shelf model
Source: Copernicus journal article supplement (doi:10.5194/cp-2017-132), 2017-10-16
Supplement: Supplementary file 2 [file cp-2017-132-supplement.zip › Bradley_2017_SOM/TablesS1_S7.xlsx]

## Sheet: Information
	This file contains the results for the suite of simulations.
	The ice-volume equivalent sea level (ESL) is estimated for the Last Interglacial (LIG) and the Last Glacial Maximum (LGM), where a (+) ESL indicates a smaller than present day GrIS, (-) ESL indicates a larger than present day GrIS.
	The Total LIG ESL contribution (Total LIG ESL) is calculated by comparing the difference in the simulated LIG minimum to the present day extent taken from either: (i) 'rel mdl PD': the modelled present day extent, (ii) 'rel obs PD' the observed surface elevation (Bamber et al., 2013)
	The difference in LIG ESL contribution (Diff in LIG ESL) is calculated by comparing the difference in the simulated LIG minimum volume to: (i) 'Rel no RSL forcing': the minimum volume from with shelves simulaiton combined with ESL forcing; (ii) 'Rel to sheet only': the minimum volume from sheet-only simulation combined with ESL forcing.
	The Total LGM ESL contribution (Total LGM ESL) is calculated using the simulated present day ice volume. The difference in LGM ESL contibution (Diff in LGM ESL) is calculated relative to the: (i) 'rel no RSL forcing': total LGM ESL from with-shelves simulations combined with ESL forcing; (ii) 'rel to sheet-only': total LGM ESL contribution from simulations using sheet-only combined with ESL forci…
	All grey shaded simulations resulted in grounded ice sheet which expanded across the Nares Strait and NW margin during glacial period, but there was no corresponding retreat back to the present day coastline
	All simulations marked with (*) grounded across the Nares strait and NW margin and retreated back to the present day coastline by present day.
	Table S1		Results for the simulations using sheet-only combined with ESL forcing (no RSL forcing) (a) and with RSL forcing (b) for a range of As parameters (m8 N-3yr-1). (c) Contribution to Eustatic sea level including RSL forcing, with differences relative to ESL forcing.
	Table S2		Results for with-shelves combined with RSL forcing and SSM Method 2: Constant SSM (Fig.S2) The results in italics are the same parameters as in Colleoni et al., 2014.
	Table S3		Results for with-shelves combined with RSL forcing and SSM Method 3: Stepped SSM (Fig.S2). Results are shown for three SSM2 values:2.45 ,5 and 10 m/yr for a range of water depths (475-800m) and SSM1 (0.25-1.5 m/yr)
	Table S4		Results for with-shelves combined with RSL forcing and SSM Method4: Exponential SSM (Fig.S2) with varying As and SSM1 (0.25-5 m/yr), with a constant water depth 1, 475m and SSM2= 150 m/yr.
			* Sensitivty to changes in As and SSM1
	Table S5		Results for with-shelves combined with RSL forcing and SSM Method4: Exponential SSM (Fig.S2) with varying water depth1 (300-700m) and SSM1(0.25-1 m/yr) for two As (0.1 and 1.0) parameters. Constant SSM2=150 m/yr.
			Sentivity to changes in water depth1
	Table S6		Results for with-shelves combined with RSL forcing and SSM Method4: Exponential SSM (Fig.S2)for variable SSM2 (10-150 m/yr) over a range of SSM1 (0.5-1 m/yr) and As (0.1×10-10 to 1.2×10-10) . Constant water depth1 = 475m.
			(two tables) results to illustrate the sensitivty to changes in SSM2 and water depth1
	TableS7		Results for with-shelves combined with RSL forcing and SSM Method4: Exponential SSM investigating the influence of variable water depth1 (400-600m) over a range of SSM2 (75-100 m/yr) and As values. Constant SSM1=1 m/yr

## Sheet: TableS1
			(a)					(b)							(c)
	As ×10-10		without RSL forcing		Ice Volume: *1015			with RSL forcing		Ice Volume: *1015			As ×10-10		Total LIG ESL	Total LIG ESL	Diff in LIG ESL	Total LGM ESL	Diff in LGM ESL
	(m8 N-3 yr-1)		LIG max	LIG min	LGM	Present day		LIG max	LIG min	LGM	Present day		(m8 N-3 yr-1)		rel. mdl PD	rel obs PD
	0.04		3.8748	2.72756	3.66076	3.2394		3.7766	2.84739	3.58555	3.23435		0.04		0.940676	0.17651	-0.291299	-0.853746	-0.170555
	0.1		3.86441	2.71597	3.64828	3.22972		3.7365	2.80527	3.57305	3.20496		0.1		0.971622	0.278902	-0.217083	-0.894804	-0.12269
	0.3		3.81625	2.62641	3.61014	3.16201		3.72846	2.73566	3.53486	3.14921		0.3		1.00531	0.448119	-0.26558	-0.937492	-0.151885
	0.5		3.77522	2.53093	3.60295	3.10144		3.69943	2.68353	3.518	3.09769		0.5		1.0068	0.574844	-0.370961	-1.02175	-0.197392
	0.8		3.76495	2.50995	3.5641	2.96368		3.69041	2.56635	3.52113	2.98687		0.8		1.02226	0.859702	-0.137105	-1.29875	-0.160831
	1		3.75766	2.36711	3.55401	2.91686		3.66713	2.51317	3.49797	2.94857		1		1.05843	0.988979	-0.355063	-1.33556	-0.213315
	1.2		3.71253	2.39003	3.56291	2.91164		3.64712	2.44816	3.49057	2.90737		1.2		1.11631	1.14701	-0.14131	-1.41772	-0.165474
	1.8		3.72424	2.28015	3.55333	2.80893		3.6113	2.34336	3.45777	2.77768		1.8		1.05581	1.40178	-0.15366	-1.65326	-0.156334

## Sheet: TableS2
			Method 2: Stepped SSM
	WaterDepth1 (m)		SSM1=0.25 m/yr		SSM2=2.45 m/yr
	As=0.1 × 10-10		Total LIG ESL(m)	Total LIG ESL(m)	Diff in LIG ESL		Total LGM ESL (m)	Diff in LGM ESL
	(m8 N-3 yr-1)		rel mdl PD	rel obs PD	rel to sheet-only
	450		1.66101	-0.0064663	-0.492654		-1.8	0.907129
	600		2.33594	-0.0572729	-0.543461		-1.89	0.998557
	800		1.64796	-0.707306	-1.19349		-1.93	1.03597
	WaterDepth1 (m)		SSM1=0.25 m/yr		SSM2=2.45 m/yr
	As=1.0 × 10-10		Total LIG ESL(m)	Total LIG ESL(m)	Diff in LIG ESL		Total LGM ESL (m)	Diff in LGM ESL
	(m8 N-3 yr-1)		rel mdl PD	rel obs PD	rel to sheet-only
	450		2.33594	-0.0572729	-1.39429		-1.89	0.557803
	600		1.53764	0.0911845	-1.24583		-2.69	1.35639
	800		1.41724	-0.0346895	-1.37171		-2.77	1.43233

## Sheet: TableS3
		As=0.1×10-10 (m8 N-3 yr-1)			SSM2=2.45 m/yr
		Water Depth1		Total LIG ESL(m)	Total LIG ESL(m)	Diff in LIG ESL		Total LGM ESL (m)	Diff in LGM ESL
				rel mdl PD	rel obs PD	rel to sheet-only			rel to sheet-only
		SSM1=0.25 m/yr
		475		1.59662	-0.115761	-0.601949		-1.89893	1.00412
		600		1.71855	-0.72741	-1.2136		-1.98377	1.08896
		800		1.64759	-0.848082	-1.33427		-2.02456	1.12975
		SSM1=0.5 m/yr
		475		1.61645	-0.0610409	-0.547229		-1.89805	1.00325
		600		2.42202	-0.0831138	-0.569302		-1.87177	0.97697
		SSM1=1.0 m/yr
		475		1.60768	-0.0771823	-0.56337		-1.80001	0.905209
		600		1.65399	-0.0606762	-0.546864		-1.89292	0.998119
		800		1.71068	-0.834736	-1.32092		-2.00288	1.10807
		SSM1=1.5 m/yr
		475		1.60877	0.0373149	-0.448873		-1.63724	0.742433
		600		1.58337	-0.0412287	-0.527417		-1.70105	0.806245
		As=0.1×10-10 (m8 N-3 yr-1)			ssm2=5 m/yr
		Water Depth1		Total LIG ESL(m)	Total LIG ESL(m)	Diff in LIG ESL		Total LGM ESL (m)	Diff in LGM ESL
				rel mdl PD	rel obs PD	rel to sheet-only			rel to sheet-only
		ssm1=0.25 m/yr
		475		1.59866	-0.0545017	-0.54069		-1.88232	0.98752
		550		1.99315	-0.0874409	-0.573629		-1.72295	0.828148
		600		1.94417	-0.175319	-0.661507		-1.74974	0.854937
		ssm1=0.5 m/yr
		475		1.56348	-0.117828	-0.604015		-1.79486	0.900055
		600		1.82683	-0.262687	-0.748875		-1.70234	0.807534
		ssm1=0.75 m/yr
		475		1.56557	-0.0621591	-0.559116		-1.90299	1.00818
		600		1.95056	-0.102683	-0.583425		-1.658	0.763193
		ssm1=1.0 m/yr
		475		1.49829	-0.122106	-0.607735		-1.78638	0.891571
		600		1.51348	-0.137494	-0.632044		-1.83713	0.942329
		ssm1=1.5 m/yr
		475		1.59331	-0.0254762	-0.511664		-1.80001	0.905209
		600		1.59586	-0.0618188	-0.548007		-1.81693	0.922128
		As=0.1×10-10 (m8 N-3 yr-1)			ssm2=10 m/yr
		Water Depth1		Total LIG ESL(m)	Total LIG ESL(m)	Diff in LIG ESL		Total LGM ESL (m)	Diff in LGM ESL
				rel mdl PD	rel obs PD	rel to sheet-only			rel to sheet-only
		ssm1=0.25 m/yr
		475		1.51151	-0.0906983	-0.576886		-1.78642	0.89162
		550		1.6129	-0.0346652	-0.520853		-1.75716	0.862351
		600		1.62158	-0.0836	-0.569788		-1.89467	0.99987
		700		2.09795	-0.398382	-0.88457		-1.98404	1.08923
		ssm1=0.5 m/yr
		475		1.39237	-0.223379	-0.709567		-1.74785	0.853041
		600		1.76525	-0.112018	-0.598206		-1.75154	0.856736
		ssm1=1.0 m/yr
		475		1.55062	-0.0537967	-0.539985		-1.76275	0.867943
		600		1.54382	-0.11457	-0.600758		-1.83694	0.942135

## Sheet: TableS4
				Water Depth1=	475m
As ×10-10		Total LIG ESL(m)	Total LIG ESL(m)	Diff in LIG ESL	Diff in LIG ESL		Total LGM ESL (m)	Diff in LGM ESL	Diff in LGM ESL
(m8 N-3 yr-1)		rel mdl PD	rel obs PD	rel no RSL forcing	rel to sheet-only			rel no RSL forcing	rel to sheet-only
SSM1=0.25 m/yr
0.04		1.54856	-0.184751	-0.0765989	-0.652561		-1.83723	-0.243629	0.983485
0.1		1.51328	-0.130785	-0.0394541	-0.626769		-1.83417	-0.145176	0.939364
0.5		1.76404	0.19027	0.324117	-0.755536		-2.19818	-0.311063	1.17643
0.8		1.85792	0.500579	0.75979	-0.496228		-2.38903	-0.409662	1.09028
1.2	*	1.25468	0.366877	0.496884	-0.921448		-2.8706	-0.326743	1.45288
SSM1= 0.5 m/yr
0.04		1.53344	-0.197076	-0.257412	-0.664886		-1.84545	-0.236287	0.991702
0.1		1.4961	-0.155483	-0.346336	-0.651467		-1.85738	-0.187741	0.962579
0.3		1.7311	-0.00398674		-0.717686		-1.97558		1.03808
0.5		1.45044	0.139973	0.315439	-0.805832		-2.18721	-0.221118	1.16547
0.8		1.57627	0.386228	0.451523	-0.610579		-2.46665	-0.164283	1.1679
1		1.57627	0.386228		-0.957814		-2.46665		1.13109
1.2	*	1.45042	0.576084	0.492241	-0.712241		-2.82667	-0.36	1.40895
SSM1= 1 m/yr
0.04		1.6219	-0.12128	-0.1012	-0.58909		-1.87408	-0.154802	1.02034
0.1		1.49328	-0.13392	-0.0812906	-0.629905		-1.81409	-0.24482	0.919284
0.3		1.54909	0.0856663		-0.628033		-2.06049		1.123
0.5		1.74503	0.23145	0.164088	-0.714356		-2.15493	-0.242754	1.13318
0.8		1.66962	0.406769	0.413649	-0.590038		-2.46072	-0.308243	1.16196
1		1.45613	0.358199		-0.985843		-2.56153		1.22597
1.2	*	1.49401	0.587145	0.381512	-0.70118		-2.70984	-0.393107	1.29212
SSM1= 5 m/yr
0.04		1.57226	-0.127722	-0.111945	-0.595531		-1.60734	-0.37857	0.753591
0.5		1.49863	0.219173	-0.208477	-0.726632		-2.03715	-0.304864	1.0154
1.2	*	1.4791	0.681611	-0.140192	-0.606714	*	-2.58953	-0.246886	1.17181

## Sheet: TableS5
	As=0.1 ×10-10
	(m8 N-3 yr-1)		(a)					(b)
			Total LIG ESL(m)	Total LIG ESL(m)	Diff in LIG ESL	Diff in LIG ESL		Total LGM ESL (m)	Diff in LGM ESL	Diff in LGM ESL
	Water Depth1		rel mdl PD	rel obs PD	rel no RSL forcing	rel to sheet-only			rel no RSL forcing	rel to sheet-only
	SSM1=0.25 m/yr
	300		1.55074	-0.0840862	-0.0345436	-0.570274		-1.8024	-0.279048	0.462396
	350		1.5692	-0.0559845	-0.0327934	-0.542172		-1.83059	-0.261593	0.490594
	400		1.56506	-0.094758	-0.29728	-0.580946		-1.81309	-0.204102	0.473092
	450		1.51433	-0.107764	-0.187061	-0.593951		-1.82719	-0.104263	0.487191
	475		1.51328	-0.130785	-0.0916464	-0.669165		-1.83417	-0.145176	0.939364
	500		1.56642	-0.090042	0.550948	-0.57623		-1.81708	-0.30484	0.477078
	550	**	1.62117	-0.120064	0.44598	-0.606252	**	-1.89854	-0.276422	0.558539
	600		1.85522	-0.135282	0.403755	-0.62147		-1.86601	-0.326305	0.526013
	650		2.06907	-0.113987		-0.600175		-1.92034		0.580345
	700		1.7899	-0.611381		-1.09757		-2.0583		0.718301
	SSM1=0.5 m/yr
	300		1.59659	-0.0800751	-0.0814122	-0.508941		-1.69278	-0.388659	0.79798
	350		1.56307	-0.0933238	-0.306152	-0.635229		-1.8585	-0.233686	0.963697
	400		1.59482	-0.0550851	-0.0954144	-0.55739		-1.86324	-0.153951	0.968438
	450		1.56968	-0.080221	-0.309361	-0.624824		-1.92771	-0.00374365	1.03291
	475		1.51328	-0.130785	-0.346336	-0.641671		-1.83417	-0.145176	0.939364
	500		1.75451	-0.146002	0.161998	-0.563297		-1.84858	-0.273335	0.953779
	550		1.75626	-0.196809	0.384891	-0.642765		-1.84372	-0.33124	0.948917
	600		1.49987	-0.217107	0.458767	-0.621518		-1.91986	-0.27246	1.02505
	As=1.0 ×10-10
	(m8 N-3 yr-1)		(c)					(d)
			Total LIG ESL(m)	Total LIG ESL(m)	Diff in LIG ESL	Diff in LIG ESL		Total LGM ESL (m)	Diff in LGM ESL	Diff in LGM ESL
	Water Depth1		rel mdl PD	rel obs PD	rel no RSL forcing	rel to sheet-only			rel no RSL forcing	rel to sheet-only
	SSM1=0.25 m/yr
	300	*	1.43865	0.462535	0.301509	-0.874482		-2.56904	-0.273894	1.23348
	400		1.5646	0.453054	0.807874	-0.883962		-2.59909	-0.380053	1.26353
	500		1.54272	0.471213	0.648307	-0.865803		-2.69088	-0.460323	1.35532
	600		1.55754	-0.0346895	0.321297	-1.37171		-2.97098	-0.137433	1.63543
	SSM1=0.5 m/yr
	300	*	1.36261	0.390093	-0.222455	-0.946924		-2.46752	-0.317797	1.13197
	350		1.55648	0.52078	0.280166	-0.816236		-2.60115	-0.188373	1.2656
	400		1.45659	0.422108	0.421646	-0.914908		-2.56967	-0.283423	1.23411
	475		1.57627	0.386228		-0.950789		-2.46665		1.13109
	500		1.35014	0.333209	0.383116	-1.00381		-2.68439	-0.569399	1.34883
	550		1.62948	0.170579	0.12196	-1.16644		-2.69076	-0.291445	1.3552
	600		1.41148	-0.181129	0.215722	-1.51815		-2.78994	-0.311646	1.45438
	SSM1=1 m/yr
	300		1.45103	0.547715	-0.183998	-0.789302		-2.40046	-0.421525	1.0649
	400		1.41631	0.373878	-0.220486	-0.963138		-2.56987	-0.432318	1.23431
	475		1.45613	0.358199		-0.978818		-2.56153		1.22597
	500		1.58509	0.467372	0.547861	-0.869644		-2.56783	-0.648186	1.23227
	600		1.63444	0.29638	0.354844	-1.04064		-2.75899	-0.152979	1.42344

## Sheet: TableS6
Water Depth1=	475m		Total LIG ESL(m)	Total LIG ESL(m)	Diff in LIG ESL	Diff in LIG ESL		Total LGM ESL (m)	Diff in LGM ESL	Diff in LGM ESL
			rel mdl PD	rel obs PD	rel no RSL forcing	rel to sheet-only			rel no RSL forcing	rel to sheet-only
As=0.1×10-10	SSM2
(m8 N-3 yr-1)	150		1.49624	-0.155337	-0.349812	-0.651322		-1.85738	-0.188714	1.00364
	100		1.52293	-0.145978	0.319644	-0.641962		-1.88634	-0.24025	1.03259
SSM1=0.5m/yr	50		1.56864	-0.0776199	0.308243	-0.573604		-1.86606	-0.272435	1.01232
	40		1.58996	-0.0864685				-1.88595		1.0322
	30		1.53186	-0.178552				-1.90651		1.05277
	25		2.34637	-0.107253	0.547034	-0.603238		-1.85802	-0.335154	1.00427
	10		1.70051	-0.76526	-0.144228	-1.26095		-1.97626		1.12251
As=0.5×10-10	SSM2
(m8 N-3 yr-1)	150		1.45049	0.140022	0.316022	-0.799949		-2.18721	-0.221118	1.16547
	100		1.6721	0.14661	0.587898	-0.799196		-2.16191	-0.342495	1.14016
SSM1=0.5m/yr	50		2.05135	0.0571514	0.422497	-0.888654		-2.09907	-0.53838	1.07732
	25		1.45951	-0.619428	-0.353386	-1.56523		-2.36783	-0.185408	1.34608
	10		1.56776	-0.57025	-0.13499	-1.51606		-2.32269		1.30094
As=0.8×10-10	SSM2
(m8 N-3 yr-1)	150		1.66969	0.406842	0.41326	-0.583547		-2.46113	-0.307854	1.16238
	100		1.54316	0.289646	0.56478	-0.70716		-2.42328	-0.362915	1.12453
SSM1=1m/yr	75		1.64606	0.410683		-0.586124		-2.4304		1.13165
	50		1.71444	0.333622	0.48998	-0.663185		-2.41368	-0.390919	1.11493
	25		1.6164	-0.139536	0.151618	-1.12905		-2.42822	-0.310091	1.12946
	10		1.39947	-0.23794		-1.23475		-2.51415		1.2154
As=1.0×10-10	SSM2
(m8 N-3 yr-1)	150		1.45613	0.358199		-0.979401		-2.56153	-0.452738	1.22597
	125		1.42951	0.398869	0.500827	-0.945173		-2.68614	-0.143741	1.35058
SSM1=1m/yr	115		1.56261	0.41941		-0.924632		-2.56484		1.22928
	100		1.50521	0.478944	0.408082	-0.865098		-2.58941	-0.452738	1.25385
	75		1.5011	0.365832		-0.85676		-2.54006		1.20451
	50		1.57846	0.183633	0.117439	-1.16041		-2.41127	-0.467183	1.07571
	25		1.45732	-0.00690387	0.120866	-1.35095		-2.74878	-0.217545	1.41323
	10		1.45467	-0.0352972		-1.37934		-2.77025		1.43469
As=1.2×10-10	SSM2
(m8 N-3 yr-1)	150	*	1.49418	0.587315	0.38895	-0.704972		-2.70984	-0.401761	1.29212
	100		1.37669	0.495352	0.460055	-0.793045		-2.81996	-0.355962	1.40224
SSM1=1m/yr	75		1.55172	0.545357		-0.743041		-2.69426		1.27653
	50		1.52374	0.459545	0.261934	-0.828853		-2.7431	-0.509257	1.32537
	25		1.39636	0.0289039	0.0836243	-1.25949		-2.84534	-0.343565	1.42762
	10		1.43802	0.114206		-1.17419		-2.94333		1.52561

## Sheet: TableS7
SSM1=1 m/yr		Water Depth1		Total LIG ESL(m)	Total LIG ESL(m)	Diff in LIG ESL	Diff in LIG ESL		Total LGM ESL (m)	Diff in LGM ESL	Diff in LGM ESL
				rel mdl PD	rel obs PD	rel no RSL forcing	rel to sheet-only			rel no RSL forcing	rel to sheet-only
As=0.8×10-10 (m8 N-3 yr-1)		400		1.58689	0.389655	0.209741	-0.607151		-2.46398	-0.139609	1.16522
SSM2=75m/yr		475		1.64606	0.410683	0.486334	-0.586124		-2.4304	-0.383699	1.13165
		500		1.75169	0.480038	0.622685	-0.516769		-2.40879	-0.454172	1.11004
		600		1.50084	-0.276592	-0.126992	-1.2734		-2.73165	-0.0198122	1.43289
As=1.0×10-10 (m8 N-3 yr-1)		400	*	1.50346	0.520051	0.496009	-0.823991	*	-2.57692	-0.483271	1.24136
SSM2=75m/yr		475		1.5011	0.365832	0.225227	-0.97821		-2.54006	-0.296137	1.20451
		500		1.61118	0.501041	0.634718	-0.843001		-2.57971	-0.623925	1.24415
		600		1.63442	0.296356	0.635423	-1.04769		-2.75899	-0.281882	1.42344
As=0.8×10-10 (m8 N-3 yr-1)		400	*	1.54535	0.405213	-0.164015	-0.591593	*	-2.52312	-0.17002	1.22437
SSM2=100m/yr		475		1.54316	0.289646	0.566239	-0.70716		-2.42328	-0.362915	1.12453
		500		1.29122	0.128183	0.489834	-0.868623		-2.47192	-0.275887	1.17317
		600		2.01131	0.0582696	0.33051	-0.938537		-2.62974	-0.0580265	1.33099
As=1.0×10-10 (m8 N-3 yr-1)		400	*	1.42035	0.467567	-0.0808773	-0.876475	*	-2.60867	-0.124318	1.27311
SSM2=100m/yr		475		1.50521	0.478944	0.408179	-0.865098		-2.58941	-0.452738	1.25385
		500		1.51131	0.469682	0.727021	-0.87436		-2.65561	-0.278513	1.32005
		600		1.48827	-0.0800508	0.126166	-1.42409		-2.67124	-0.465355	1.33568
As=1.2×10-10 (m8 N-3 yr-1)		400	*	1.49831	0.593951	0.330097	-0.694373	*	-2.81167	-0.138758	1.39395
SSM2=100m/yr		475		1.37669	0.495352	0.460055	-0.792972		-2.81996	-0.355962	1.40224
		500		1.49517	0.572875		-0.71545		-2.72802		1.3103
		600		1.38534	-0.181786	-0.216013	-1.47011		-2.97603	-0.310115	1.5583
